# Supplementary material for: Pannexin 1 involvement in bladder dysfunction in a multiple sclerosis model
Source: PubMed Central journal article supplement — Sci Rep. 2013 Jul 5;3:2152. doi: 10.1038/srep02152 (PMC3701900; doi:10.1038/srep02152), 2013-07-05
Supplement: srep02152-s1.pdf [file srep02152-s1.pdf]

## Supplementary Information for

### **Pannexin 1 involvement in bladder dysfunction in a multiple sclerosis model**

Hiromitsu Negoro,<sup>1</sup> Sarah E. Lutz,<sup>2</sup> Louis S. Liou,<sup>3</sup> Akihiro Kanematsu,<sup>4,5</sup>  
Osamu Ogawa,<sup>3</sup> Eliana Scemes<sup>2</sup> and Sylvia O. Suadicani<sup>1,2</sup>

<sup>1</sup>Department of Urology and <sup>2</sup>Dominick P. Purpura Department of Neuroscience, Albert Einstein College of Medicine, Bronx, NY, 10461, USA;

<sup>3</sup>Department of Urology, Cambridge Health Alliance, Cambridge, MA, 02139, USA;

<sup>4</sup>Department of Urology Graduate School of Medicine, Kyoto University, Sakyo, Kyoto 606-8507, Japan;

<sup>5</sup>Department of Urology, Hyogo College of Medicine, Nishinomiya, Hyogo 663-8501, Japan.

Correspondence should be addressed to  
S.O.S (e-mail: [sylvia.suadicani@einstein.yu.edu](mailto:sylvia.suadicani@einstein.yu.edu))

#### **Supplementary Information includes:**

Supplementary Figures S1 to S10

Supplementary Table S1

## Supplementary Figure S1

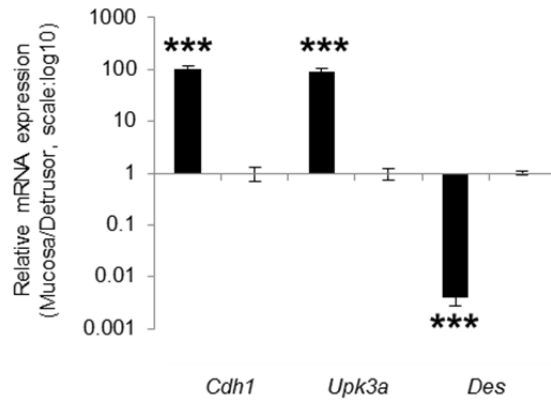

**Supplementary Figure S1 | Validation of proper separation of bladder mucosa from detrusor muscle.** Real time RT-PCR showing mRNA of *Cdh1* and *Upk3a* detected in bladder mucosa and *Des* in bladder detrusor (\*\*\*)  $P < 0.0001$  by paired Student *t*-test,  $n=5$ ). Error bars indicate SEM. For the relative expression, the values of detrusor were set as 1.

## Supplementary Figure S2

### Mucosa

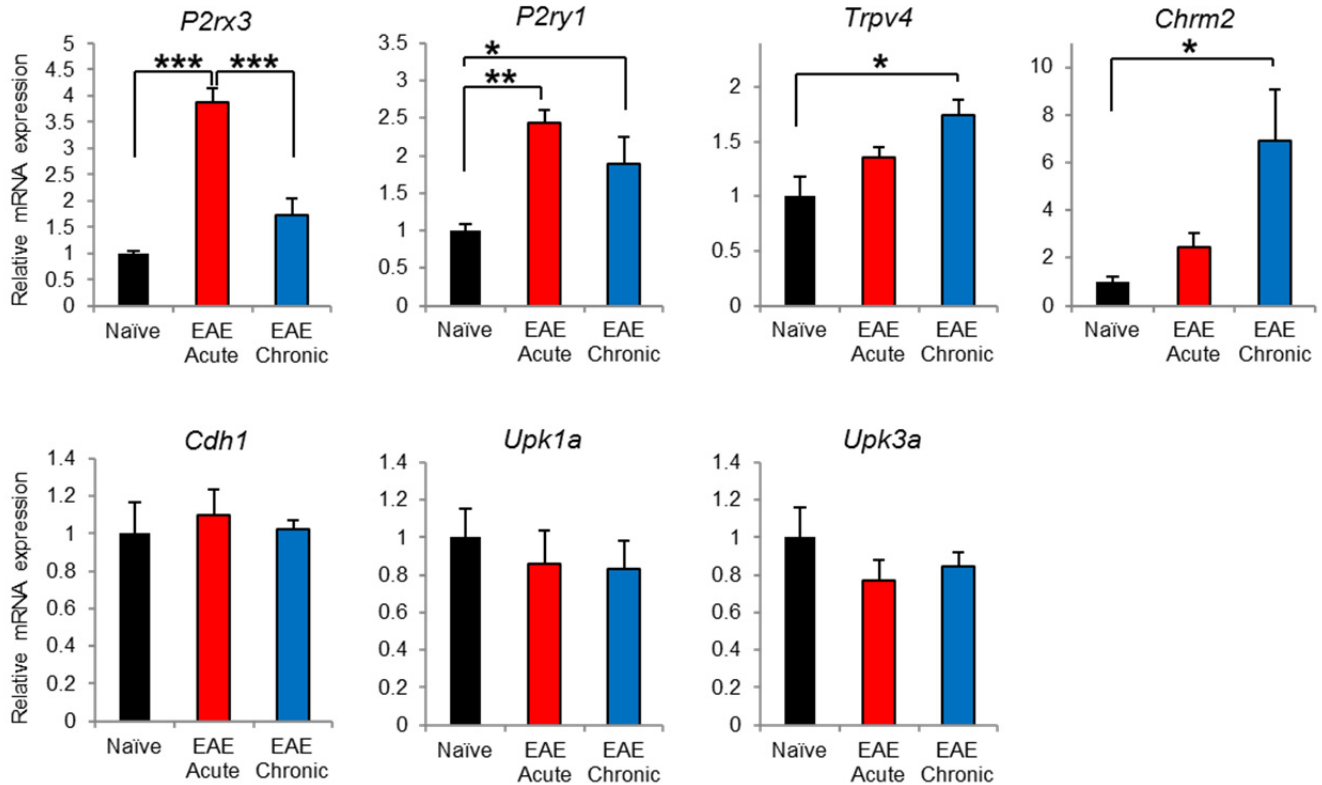

**Supplementary Figure S2 | mRNA expression levels in bladder mucosa of naive mice, and EAE mice at the acute and chronic phases of the disease.** \* $P < 0.05$  and \*\* $P < 0.01$  and \*\*\* $P < 0.001$  by one-way ANOVA followed by Tukey's *post-hoc* test ( $n=5, 3$  and  $3$ , respectively). All error bars represent SEM. For the relative expression, the values of naive mice were set as 1. Note that certain genes associated with the bladder mechanosensory, transduction and signaling systems, such as the purinergic receptors *P2rx3* and *P2ry1*, *Trpv4* (*transient receptor potential cation channel, subfamily V, member 4*) and *Chrm2* (*cholinergic receptor, muscarinic type 2*) were significantly upregulated, while urothelial marker genes were unchanged as *Cdh1*, *Upk1a* and *Upk3a*. *P2rx1*, *P2rx2*, *P2rx4*, *P2ry2*, *P2ry6* and *Chrm3* were not significantly changed (data not shown).

### Supplementary Figure S3

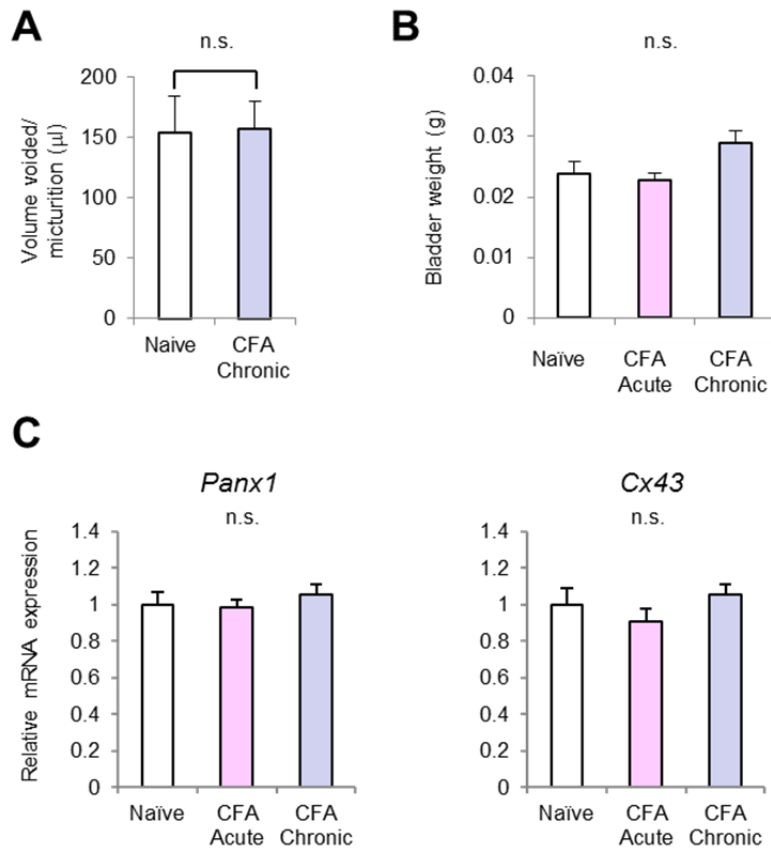

**Supplementary Figure S3 | Additional control experiments using CFA-only treated mice.** (A) Average UVVM was not significantly different in naïve mice and in mice treated only with CFA when compared at 35 days post CFA injection, a time point which would correspond to the chronic phase of EAE (n=4 and 3, unpaired *t*-test). (B, C) Bladder weight in B and mRNA expression levels of *Panx1* and *Cx43* in bladder mucosa in C were not significantly different in naïve mice and CFA-only treated mice (n=4, 4 and 3, one-way ANOVA). All error bars indicate SEM.

## Supplementary Figure S4

### Detrusor

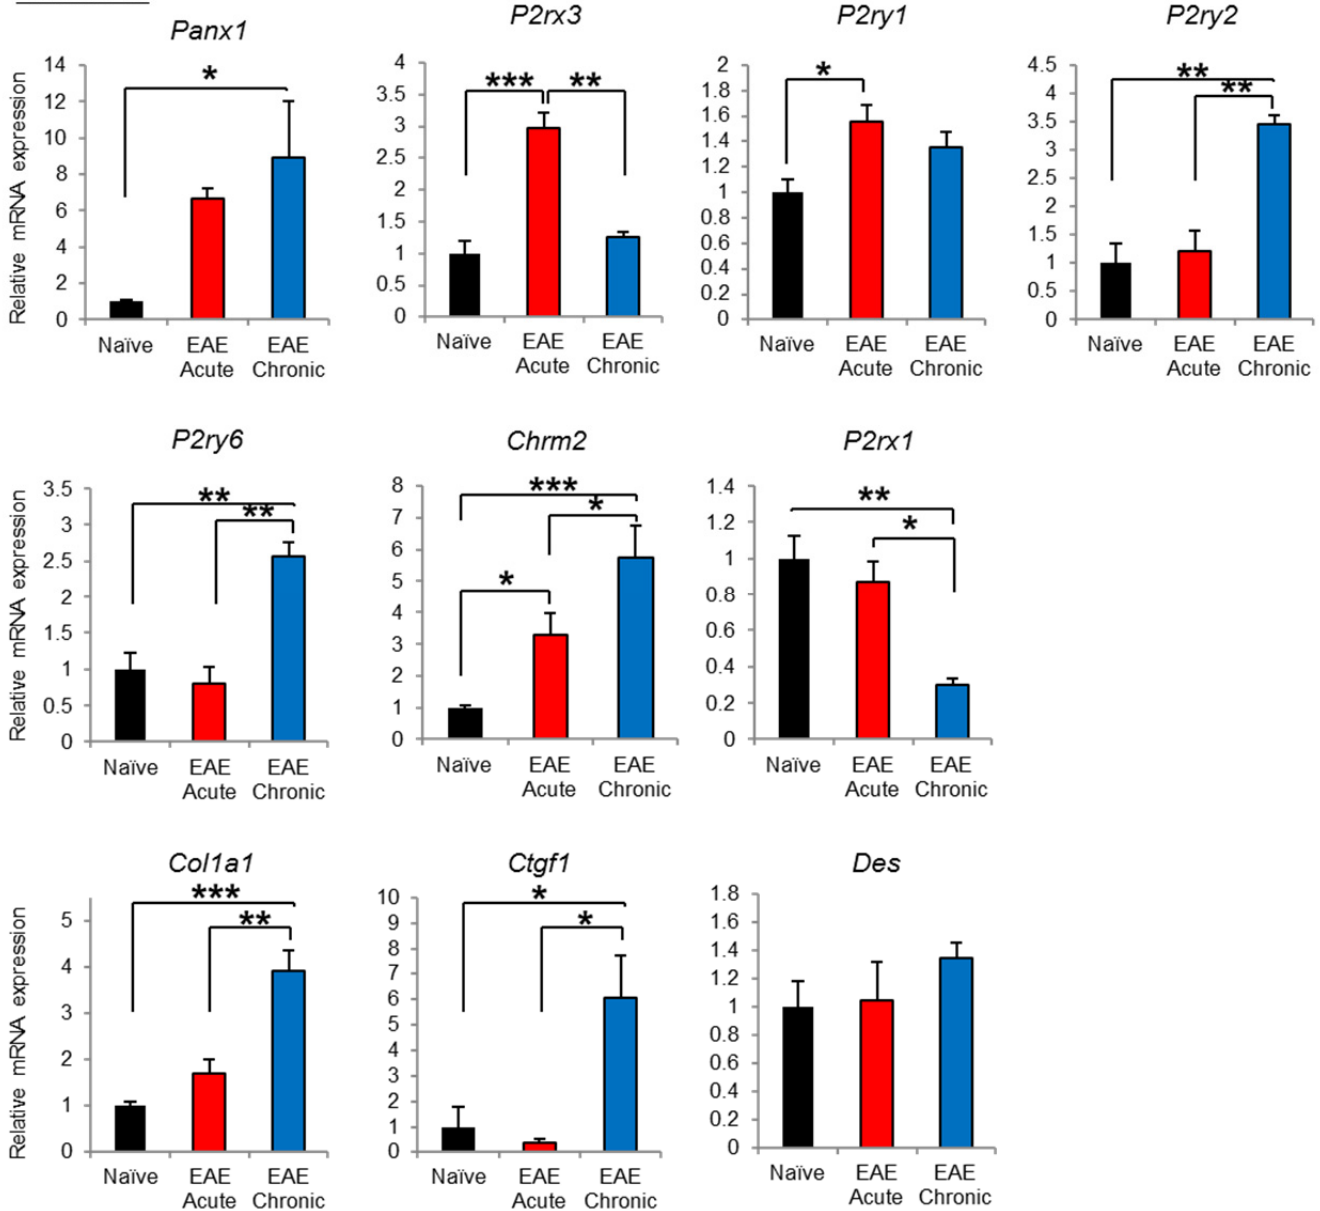

**Supplementary Figure S4 | mRNA expression levels in the bladder detrusor of naive mice, and EAE mice at the acute and chronic phases of the disease.** \* $P < 0.05$  and \*\* $P < 0.01$  and \*\*\* $P < 0.001$  by one-way ANOVA followed by Tukey's *post-hoc* test ( $n=5, 3$  and  $3$ , respectively). All error bars represent SEM. For the relative expression, the values of naive were set as 1. Note that some of genes associated with the bladder mechanosensory, transduction and signaling systems, such as *Panx1*, *P2rx3*, *P2ry1*, *P2ry2*, *P2ry6* and *Chrm2* were upregulated but *P2rx1*, a major purinergic receptor in detrusor, was down-regulated. Genes associated with fibrosis were upregulated as *Col1a1* and *Ctgf1*. *Des* (*Desmin*), a muscle marker, was relatively unchanged. *Cx43*, *P2rx2*, *P2rx4*, *Trpv4* and *Chrm3* were not significantly changed (data not shown).

## Supplementary Figure S5

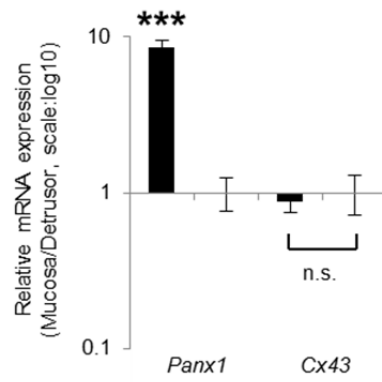

**Supplementary Figure S5 | Differences in *Panx1* and *Cx43* mRNA expression levels between the bladder mucosa and detrusor.** \*\*\* $P < 0.0001$  by paired  $t$ -test ( $n=5$ ). All error bars represent SEM. For the relative expression, the values of detrusor were set as 1.

**Supplementary Figure S6**

**A Mucosa**

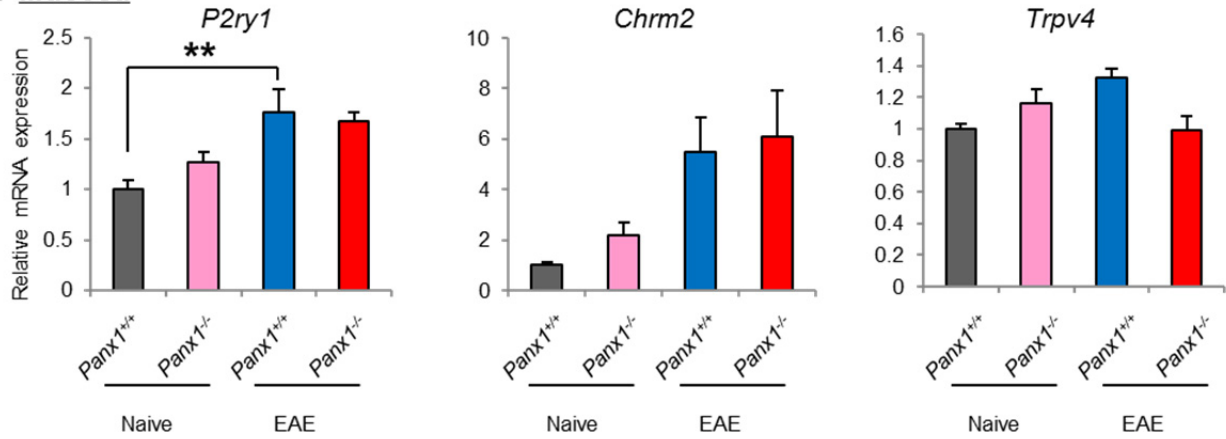

**B Detrusor**

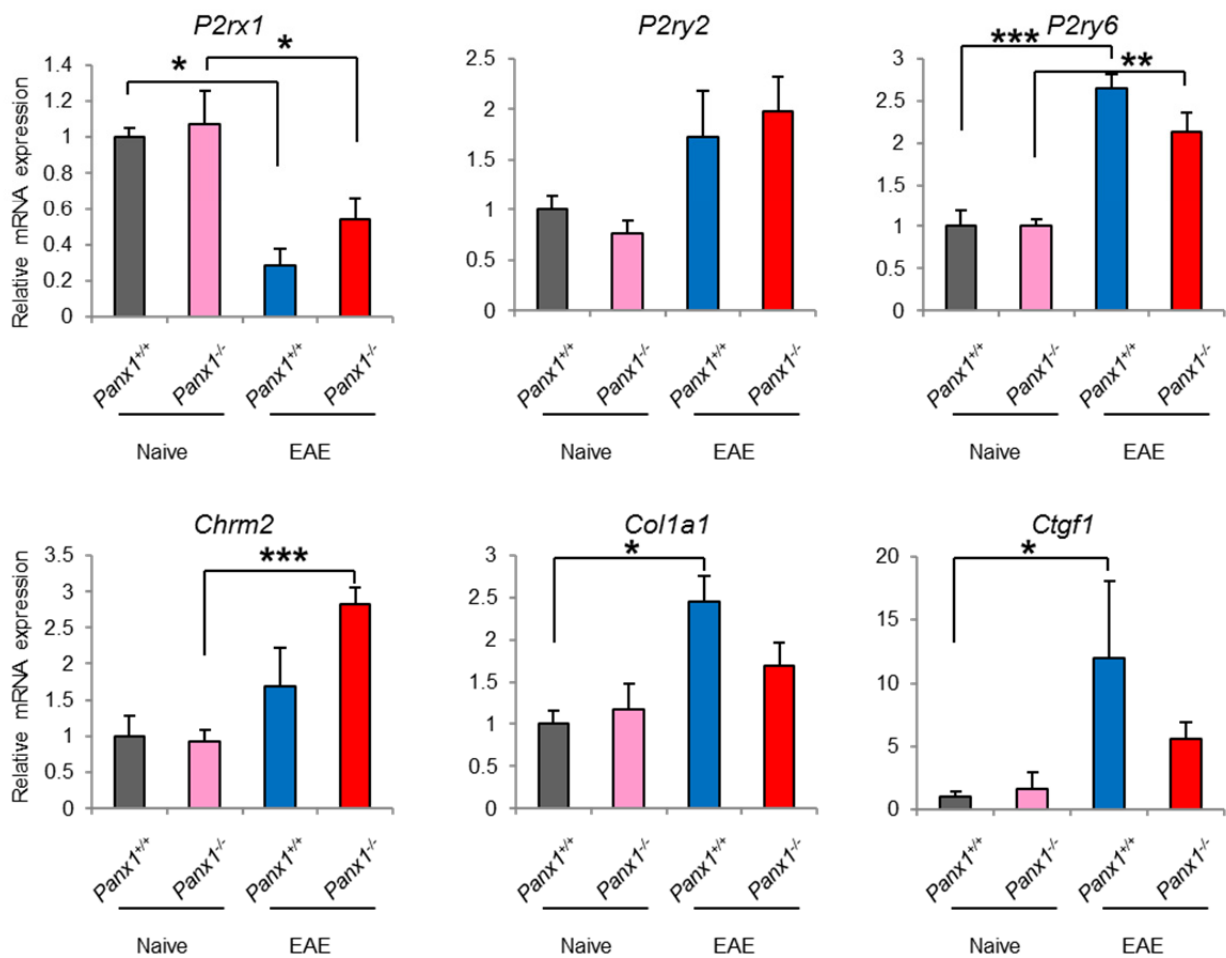

**Supplementary Figure S6 | mRNA levels for some of the genes associated with the bladder mechanosensory, transduction and signaling systems expressed in the bladder mucosa (A) and detrusor (B) of *Panx1*<sup>+/+</sup> and *Panx1*<sup>-/-</sup> naïve and EAE mice.** Upregulation of *P2y1* and *Chrm2* in mucosa, and *P2ry2* and *P2ry6* in detrusor observed in *Panx1*<sup>+/+</sup> EAE mice were also detected in *Panx1*<sup>-/-</sup> EAE mice. Upregulation of *Trpv4* in mucosa, and genes associated with fibrosis as *Col1a1* and *Ctgf1* in detrusor observed in *Panx1*<sup>+/+</sup> EAE mice was not or less detected in *Panx1*<sup>-/-</sup> EAE mice, although they are not significantly different. \**P* < 0.05 and \*\**P* < 0.01 and \*\*\**P* < 0.001 by one-way ANOVA followed by Bonferroni's *post-hoc* test (n=5, 4, 3 and 8, respectively). All error bars indicate SEM.

## Supplementary Figure S7

### Naive

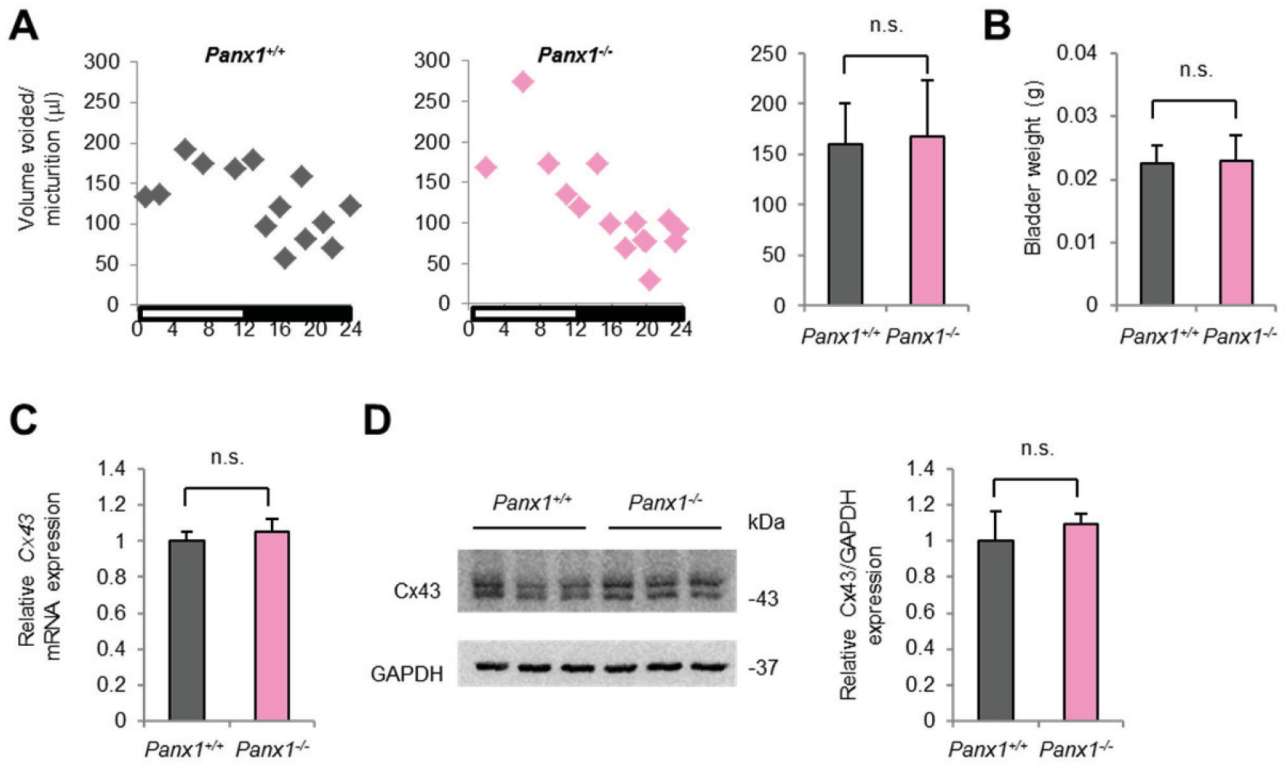

**Supplementary Figure S7 | *Panx1*<sup>+/+</sup> and *Panx1*<sup>-/-</sup> naïve mice display similar phenotypes in terms of micturition and Cx43 expression in the bladder mucosa.** (A) Representative charts of urine volume voided per micturition (UVVM) from *Panx1*<sup>+/+</sup> (left panel) and *Panx1*<sup>-/-</sup> naïve mice (middle panel), and corresponding average UVVM (n=3 each genotype). No significant difference (n.s.) by unpaired *t*-test. (B) Bladder weight was not significantly different by unpaired *t*-test (n=3). (C, D) Expression levels of Cx43 mRNA in C and its protein in D in the bladder mucosa of *Panx1*<sup>+/+</sup> and *Panx1*<sup>-/-</sup> naïve mice were not significantly different by unpaired *t*-test (n=3). All error bars indicate SEM. Full-length blots are presented in Supplementary Fig. S17.





## Supplementary Figure S9

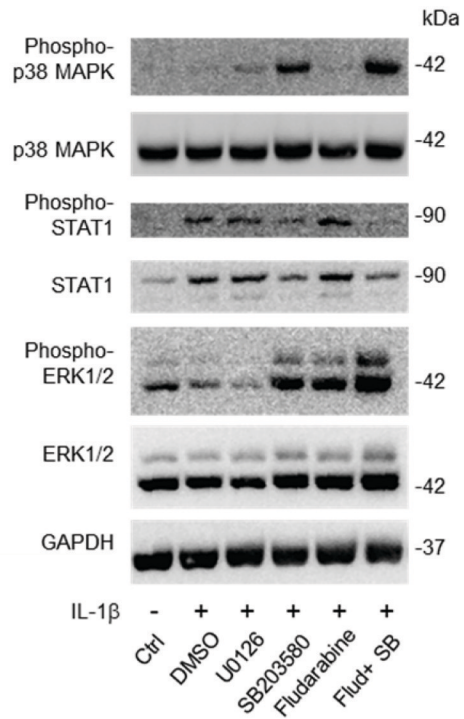

**Supplementary Figure S9 | Effects of U0126, SB203580 and Fludarabine on expression and phosphorylation of target proteins in TRT-HU1 cells.** U0126 inhibited phosphorylation of ERK1/2. SB203580 inhibits p38 catalytic activity, therefore did not inhibit p38 phosphorylation. Fludarabine increased STAT1 phosphorylation. Full-length blots are presented in Supplementary Fig. S18.

**Supplementary Figure S10**

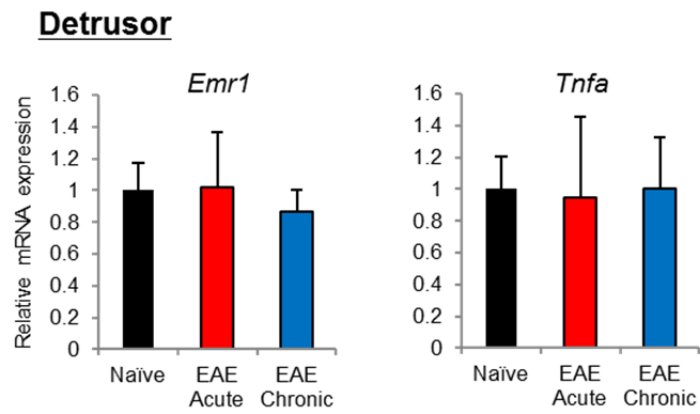

**Supplementary Figure S9 | mRNA expression levels of *Emr1* and *Tnfa* in the bladder detrusor of naïve mice, and EAE mice at acute and chronic phases of the disease.** No significant differences in naïve, EAE acute and chronic phases by one-way ANOVA (n=5, 3 and 3, respectively). All error bars indicate SEM.

**Supplementary Figure S11**

Figure 2C

Panx1

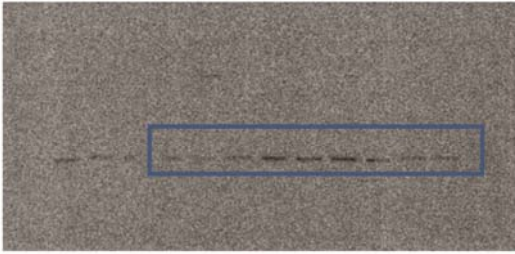

GAPDH

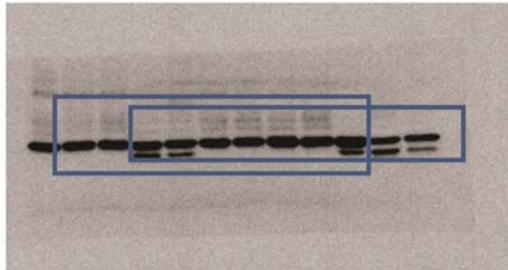

Figure 2D

Cx43

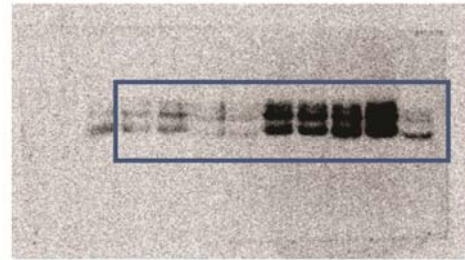

GAPDH is common in 2C and 2D

Panx1

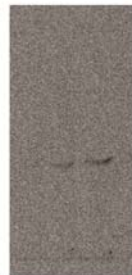

GAPDH

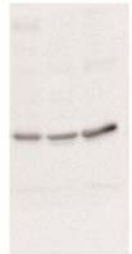

**Supplementary Figure S11 | Full-length unedited blots for Figures 2C and 2D.**

**Supplementary Figure S12**

Cx43

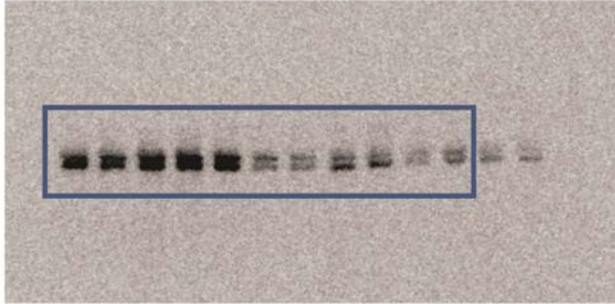

GAPDH

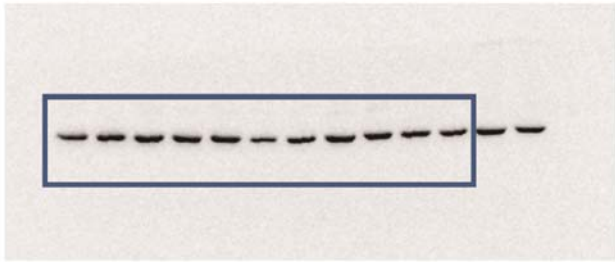

**Supplementary Figure S12 | Full-length unedited blots for Figure 3E.**

**Supplementary Figure S13**

Cx43

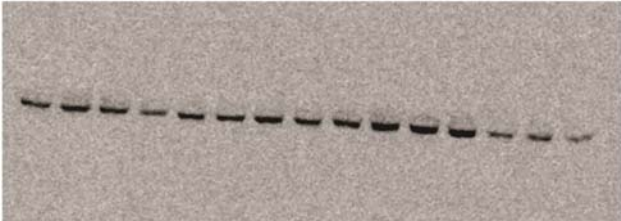

GAPDH

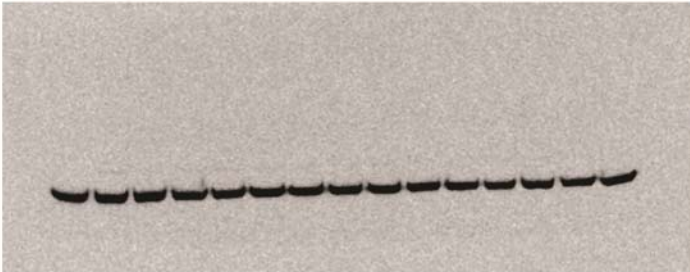

**Supplementary Figure S13 | Full-length unedited blots for Figure 4C.**

**Supplementary Figure S14**

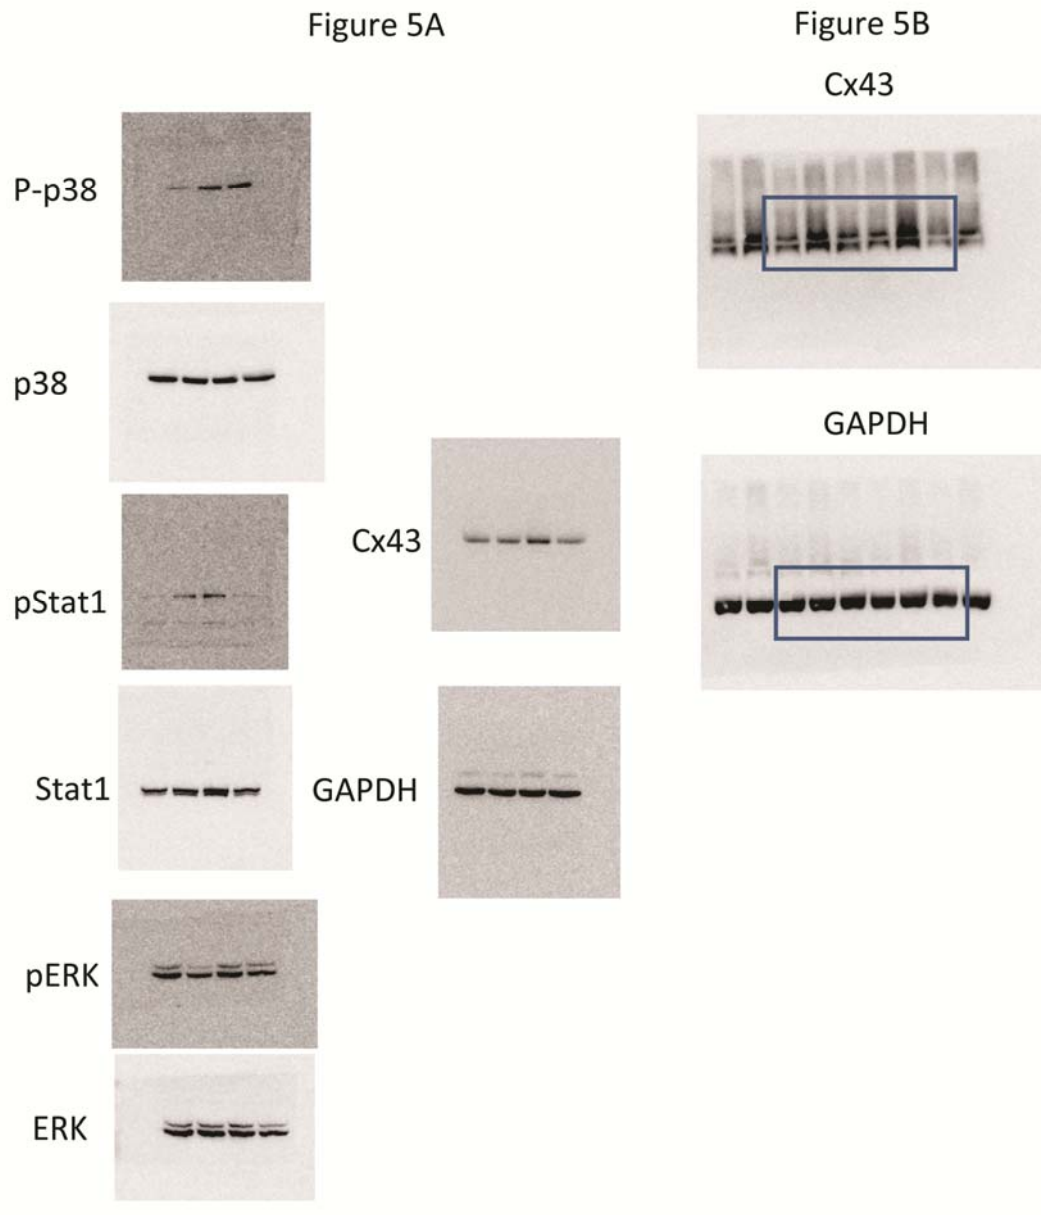

**Supplementary Figure S14 | Full-length unedited blots for Figures 5A and 5B.**

Figure 6B

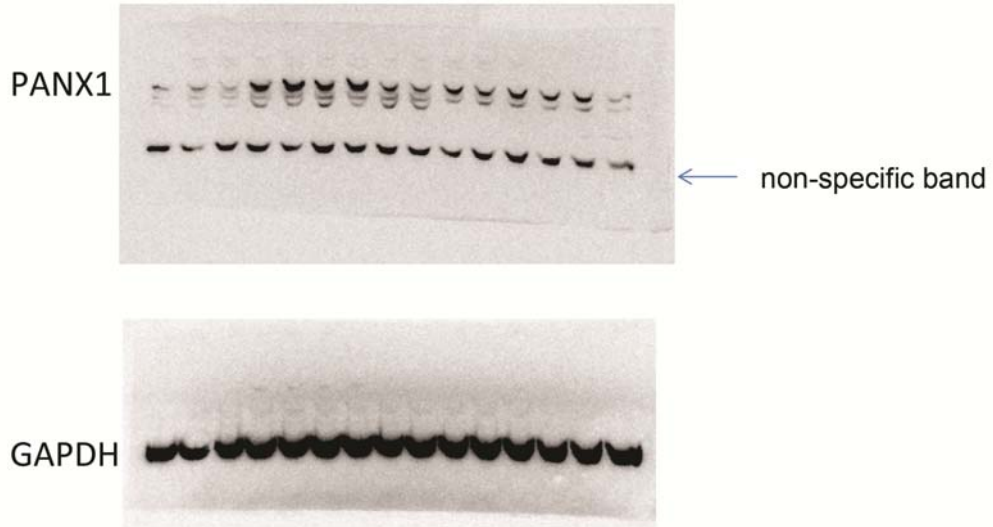

Figure 6D

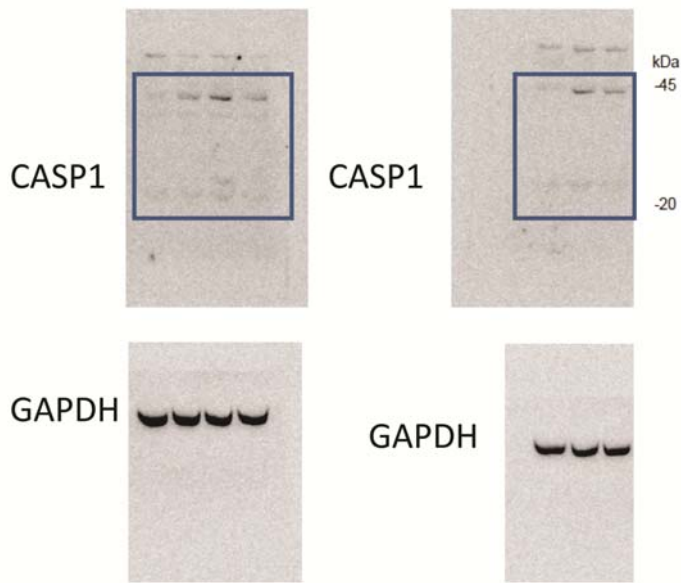



**Supplementary Figure S16**

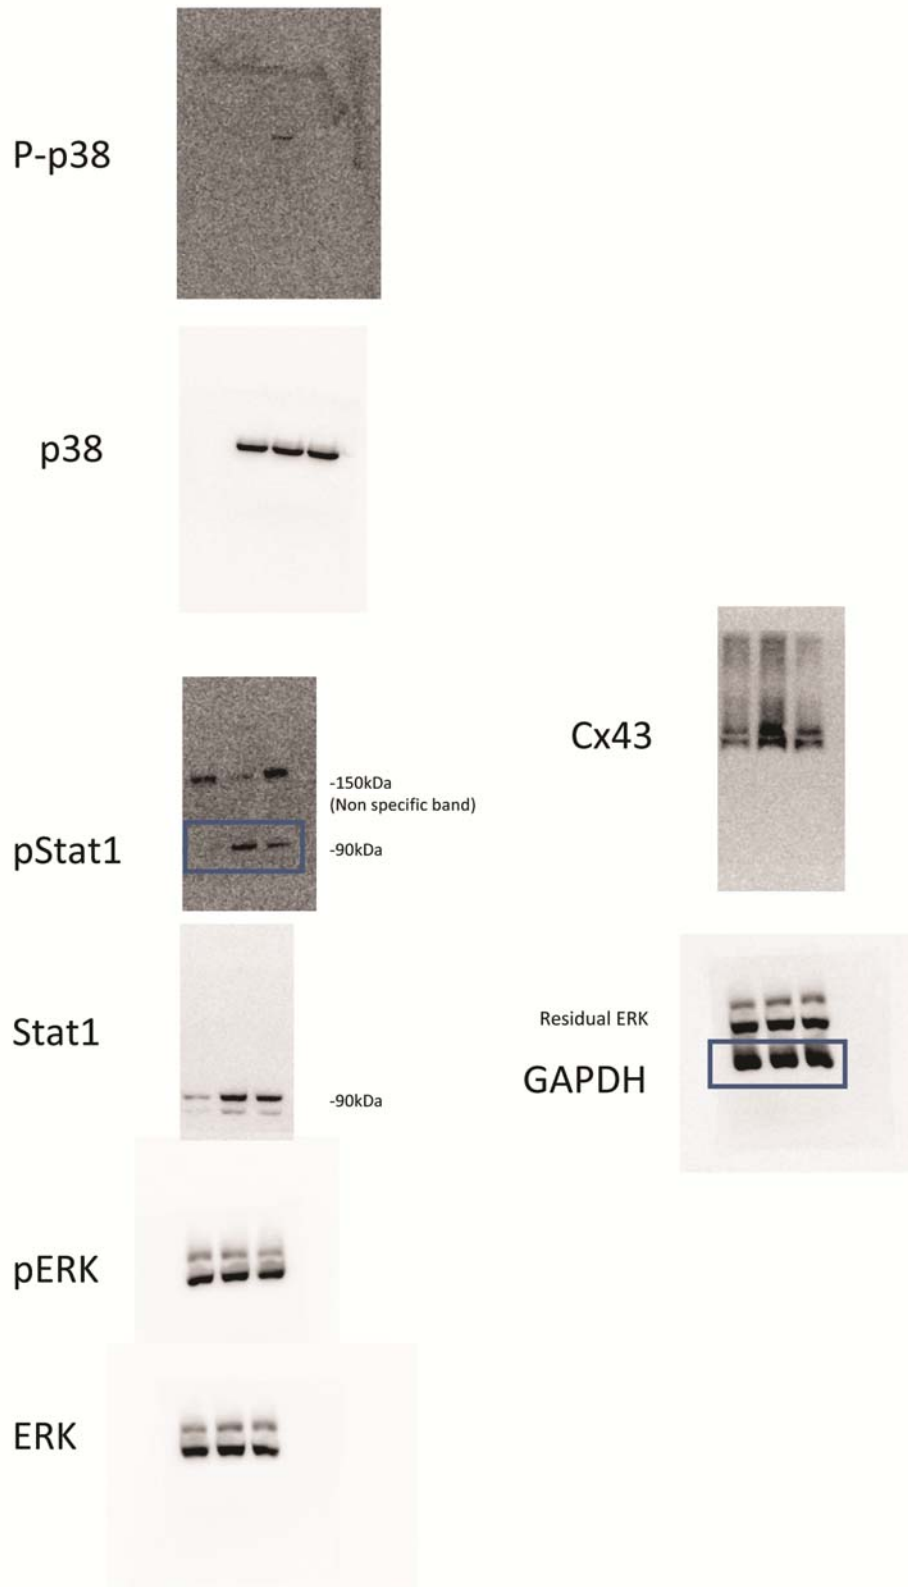

**Supplementary Figure S16 | Full-length unedited blots for Figure 7B.**

**Supplementary Figure S17**

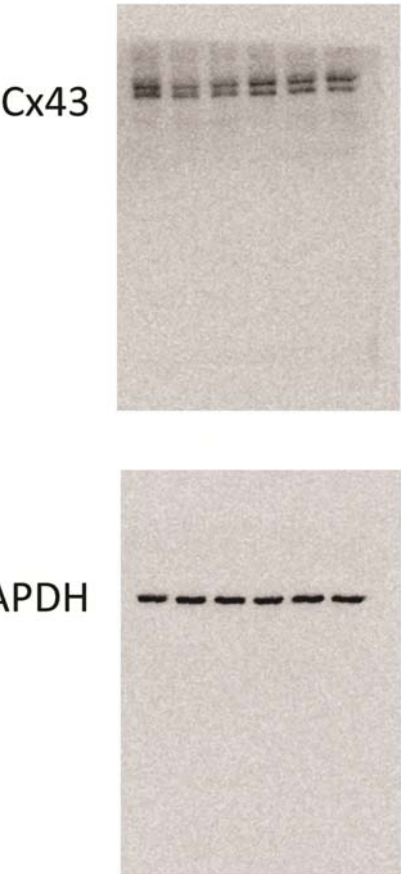

**Supplementary Figure S17 | Full-length unedited blots for Supplementary Figure S7 D.**

**Supplementary Figure S18**

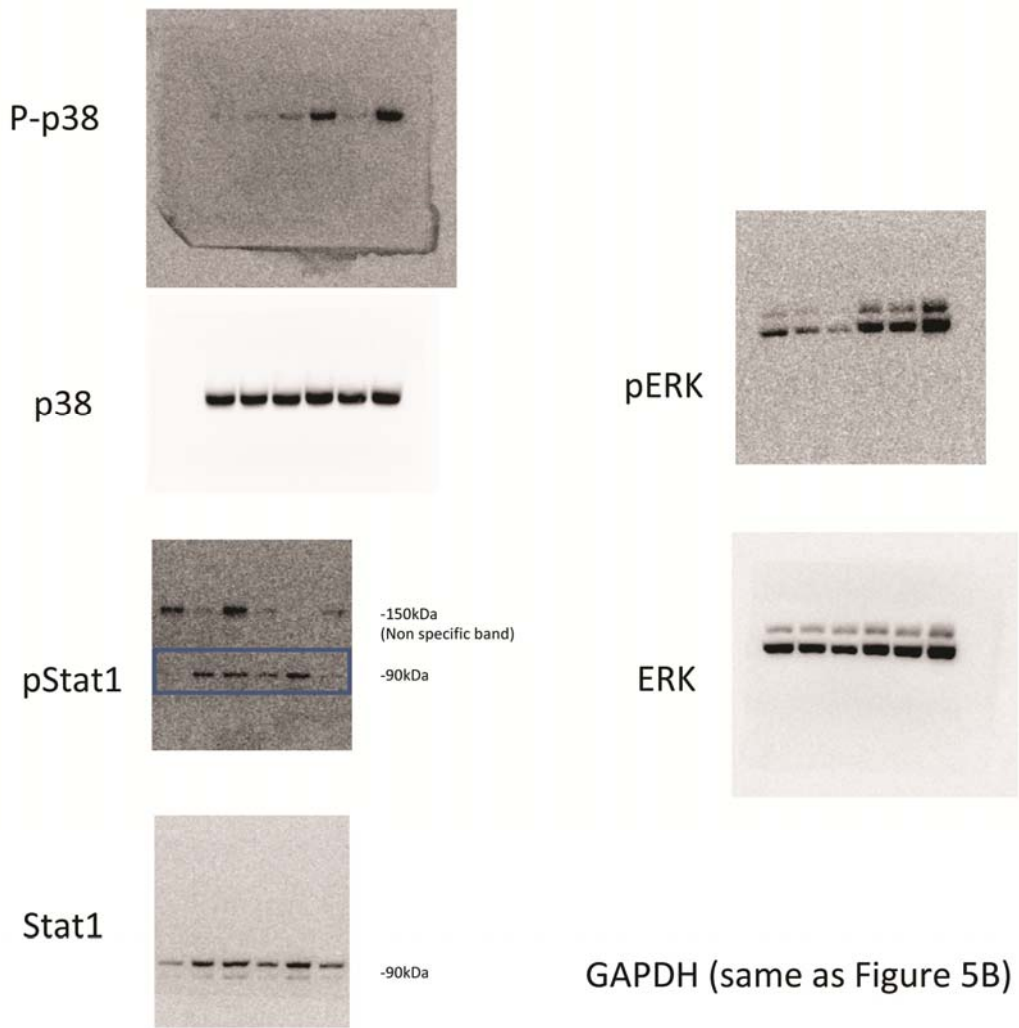

**Supplementary Figure S17 | Full-length unedited blots for Supplementary Figure S9.**

## Supplementary Table S1

### Primers for real-time RT-PCR

| Species        | Gene name      | Accession               | Forward (5'→3')             | Reverse (5'→3')         | Amplicon size (b.p.) |
|----------------|----------------|-------------------------|-----------------------------|-------------------------|----------------------|
| Mouse          | <i>Panx1</i>   | NM_019482               | AGCCAGAGAGTGGAGTTCAAAGA     | CATTAGCAGGACGGATTCAGAA  | 104                  |
|                | <i>Cx43</i>    | NM_010288               | CCATCCAAAGACTGCGGAT         | GTAATTGCGGCAGGAGGAA     | 138                  |
|                | <i>P2rx1</i>   | NM_008771               | AGCCCAAGGTATTCGCACA         | ACAGGACACCAGCCAAAGATC   | 81                   |
|                | <i>P2rx2</i>   | NM_001164833            | AAAACAAGCTCTACAGCCATAAGAAGT | TCAAAGTTGGGCCAAACCTT    | 140                  |
|                | <i>P2rx3</i>   | NM_145526               | GCCCAACAGTGAGCTTTCTC        | ATTTCCCTGGGCTCTCCTAA    | 58                   |
|                | <i>P2rx4</i>   | NM_011026               | CACAACGTGCTCCTGGCTA         | GCCTTTCCAAACACGATGAT    | 125                  |
|                | <i>P2ry1</i>   | NM_008772               | AGGAAAGCTTCCAGGAGGAG        | CGTGTCTCCATTCTGCTTGA    | 95                   |
|                | <i>P2ry2</i>   | NM_008773               | CGTGCTTACTTCGTACCA          | AAAAGCAGACCCAGCATGAC    | 102                  |
|                | <i>P2ry6</i>   | NM_183168               | CATTAGTTCAGCGCTACC          | CTCCACACACTACCCAAGCA    | 91                   |
|                | <i>Trpv4</i>   | NM_022017               | CACCCAGTGACAACAAGAGA        | CGATTGAAGACTTTGAGGATGG  | 107                  |
|                | <i>Chrm2</i>   | NM_203491               | CATTGCGGCTTTCTATCTGC        | TCTGGATCTTGTGTGCTCCA    | 212                  |
|                | <i>Chrm3</i>   | NM_033269               | ACACCTTCTGTGACAGCTGCA       | TCGCTTGTGAAAAATGACGG    | 212                  |
|                | <i>Upk1a</i>   | NM_026815               | CCTCCTGCATCACATCCTACA       | CCACAACACTCTTGCTCAATCA  | 157                  |
|                | <i>Upk3a</i>   | NM_023478               | CATCATCCTCAGCTTTGTGGA       | GAGAACACCTCTGTCTGTCTAGG | 159                  |
|                | <i>Cdh1</i>    | NM_009864               | GAGGAGAACGGTGGTCAAAGA       | AGCTGGCTCAAATCAAAGTCC   | 120                  |
|                | <i>Col1a1</i>  | NM_007742               | GCAACAGTCGCTTCACCTACA       | CAATGTCCAAGGGAGCCACAT   | 137                  |
|                | <i>Ctgf1</i>   | NM_010217               | AGAACTGTGTACGGAGCGTGAC      | CACCATCTTTGGCAGTGCA     | 107                  |
|                | <i>Des</i>     | NM_010043               | AAGGCCAAACTACAGGAGGAAA      | TACGAGCTAGAGTGGCTGCATC  | 97                   |
|                | <i>IL-1β</i>   | NM_008361               | CAGGCAGGCAGTATCACTCA        | TGTCCTCATCCTGGAAGGTC    | 90                   |
|                | <i>IL-6</i>    | NM_031168               | CCGGAGAGGAGACTTCACAG        | TCCACGATTTCCAGAGAAC     | 102                  |
| <i>Tnfa</i>    | NM_013693      | ACGGCATGGATCTCAAAGAC    | GTGGGTGAGGAGCACGTAGT        | 116                     |                      |
| <i>Nfkb1</i>   | NM_008689      | GGAAAAAACATCCACCTGCAC   | TGCAAAGCCAACCACCAT          | 105                     |                      |
| <i>Emr1</i>    | NM_010130      | TCAGTCTCGCAACATCAAGA    | ACCAGCAGCGATTATGCATC        | 123                     |                      |
| <i>IL-1R-1</i> | NM_008362      | TACCCGAGGTCCAGTGGTATAAG | AGCCACATTCTCACCAACAG        | 98                      |                      |
| Human          | <i>Cx43</i>    | NM_000165               | AGCAAAAAGAGTGGTGCCCA        | TTGTCAAGGAGTTTGCCTAAGG  | 63                   |
|                | <i>IL-1β</i>   | NM_000576               | TTATGTGCACGATGCACCTG        | AGGACATGGAGAACACCACCTTG | 149                  |
|                | <i>IL-1R-1</i> | NM_000877               | AGAGGAAAACAAACCCACAAGG      | AACTGGCCGGTGACATTACAG   | 108                  |
|                | <i>STAT1</i>   | NM_007315               | ATCTGTCTTCTTCTGACTCCA       | CCTTACAAAACCTCGTCCACG   | 186                  |
|                | <i>PANX1</i>   | NM_015368               | GGCAGAGCTCAAAGGTATGAA       | GCAAACCAGCTGTGAAACCA    | 186                  |
|                | <i>CASP1</i>   | NM_033294               | GGAAACAAAAGTCGGCAGAGA       | GATAATGAGAGCAAGACGTGTGC | 72                   |

Supplementary Table S1 | Primers used for real-time RT-PCR. Primers were designed using Primer Express 2.0 software (Applied Biosystems).

## Supplementary Table S1

### Primers for real-time RT-PCR

| Species        | Gene name      | Accession               | Forward (5'→3')             | Reverse (5'→3')          | Amplicon size (b.p.) |
|----------------|----------------|-------------------------|-----------------------------|--------------------------|----------------------|
| Mouse          | <i>Panx1</i>   | NM_019482               | AGCCAGAGAGTGGAGTTCAAAGA     | CATTAGCAGGACGGATTAGAA    | 104                  |
|                | <i>Cx43</i>    | NM_010288               | CCATCCAAAGACTGCGGAT         | GTAATTGCGGCAGGAGGAA      | 138                  |
|                | <i>P2rx1</i>   | NM_008771               | AGCCCAAGGTATTTCGCACA        | ACAGGACACCAGCCAAAGATC    | 81                   |
|                | <i>P2rx2</i>   | NM_001164833            | AAAACAAGCTCTACAGCCATAAGAAGT | TCAAAGTTGGGCCAAACCTT     | 140                  |
|                | <i>P2rx3</i>   | NM_145526               | GCCCAACAGTGAGCTTTCTC        | ATTTCCCTGGGCTCTCCTAA     | 58                   |
|                | <i>P2rx4</i>   | NM_011026               | CACAACGTGTCTCTGGCTA         | GCCTTTCCAAACACGATGAT     | 125                  |
|                | <i>P2ry1</i>   | NM_008772               | AGGAAAGCTTCCAGGAGGAG        | CGTGTCTCCATTCTGCTTGA     | 95                   |
|                | <i>P2ry2</i>   | NM_008773               | CGTGCTCTACTTCGTCACCA        | AAAAGCAGACCCAGCATGAC     | 102                  |
|                | <i>P2ry6</i>   | NM_183168               | CATTAGCTTCCAGCGCTACC        | CTCCACACACTACCCAAGCA     | 91                   |
|                | <i>Trpv4</i>   | NM_022017               | CACCCCAGTGACAACAAGAGA       | CGATTGAAGACTTTGAGGATGG   | 107                  |
|                | <i>Chrm2</i>   | NM_203491               | CATTGCGGCTTTCTATCTGC        | TCTGGATCTTGTTGTGCTCCA    | 212                  |
|                | <i>Chrm3</i>   | NM_033269               | ACACCTTCTGTGACAGCTGCA       | TCGCTTGTGAAAAATGACGG     | 212                  |
|                | <i>Upk1a</i>   | NM_026815               | CCTCCTGCATCACATCCTACA       | CCACAACACTTTGCTCAATCA    | 157                  |
|                | <i>Upk3a</i>   | NM_023478               | CATCATCCTCAGCTTTGTGGA       | GAGAACACCTCTGCTCTGTCTAGG | 159                  |
|                | <i>Cdh1</i>    | NM_009864               | GAGGAGAACGGTGGTCAAAGA       | AGCTGGCTCAAATCAAAGTCC    | 120                  |
|                | <i>Col1a1</i>  | NM_007742               | GCAACAGTCGCTTACCTACA        | CAATGTCCAAGGGAGCCACAT    | 137                  |
|                | <i>Ctgf1</i>   | NM_010217               | AGAAGTGTGTACGGAGCGTGAC      | CACCATCTTTGGCAGTGCA      | 107                  |
|                | <i>Des</i>     | NM_010043               | AAGGCCAAACTACAGGAGGAAA      | TACGAGCTAGAGTGGCTGCATC   | 97                   |
|                | <i>IL-1β</i>   | NM_008361               | CAGGCAGGCAGTACTCACTCA       | TGTCCTCATCCTGGAAGGTC     | 90                   |
|                | <i>IL-6</i>    | NM_031168               | CCGGAGAGGAGACTTACAG         | TCCACGATTTCCAGAGAAC      | 102                  |
| <i>Tnfa</i>    | NM_013693      | ACGGCATGGATCTCAAAGAC    | GTGGGTGAGGAGCACGTAGT        | 116                      |                      |
| <i>Nfkb1</i>   | NM_008689      | GGAAAAAATCCACCTGCAC     | TGCAAAGCCAACCACCAT          | 105                      |                      |
| <i>Emr1</i>    | NM_010130      | TCAGCTCTCGAACATCAAGA    | ACCAGCAGCGATTATGCATC        | 123                      |                      |
| <i>IL-1R-1</i> | NM_008362      | TACCCGAGGTCCAGTGGTATAAG | AGCCACATTCTACCAACAG         | 98                       |                      |
| Human          | <i>Cx43</i>    | NM_000165               | AGCAAAAGAGTGGTGCCCA         | TTGTCAAGGAGTTTGCCTAAGG   | 63                   |
|                | <i>IL-1β</i>   | NM_000576               | TTATGTGCACGATGCACCTG        | AGGACATGGAGAACCACCTTG    | 149                  |
|                | <i>IL-1R-1</i> | NM_000877               | AGAGGAAAAACAAACCCACAAGG     | AACTGGCCGGTGACATTACAG    | 108                  |
|                | <i>STAT1</i>   | NM_007315               | ATCTGTCTTCTTCTGACTCCA       | CCTTACAAAACCTCGTCCACG    | 186                  |
|                | <i>PANX1</i>   | NM_015368               | GGCAGAGCTCCAAGGTATGAA       | GCAAACCAGCTGTGAAACCA     | 186                  |
|                | <i>CASP1</i>   | NM_033294               | GGAAACAAAAGTCGGCAGAGA       | GATAATGAGAGCAAGACGTGTGC  | 72                   |

**Supplementary Table S1 | Primers used for real-time RT-PCR.** Primers were designed using Primer Express 2.0 software (Applied Biosystems).
